# Supplementary material for: Synthesis, structural features, magnetic properties and thermal decomposition of a new series of polymeric Ln(iii)–Cr(iii) cyclopropane-1,1-dicarboxylates
Source: Royal Society of Chemistry journal article supplement (doi:10.1039/d3nj03027j), 2023-01-01
Supplement: d3nj03027j1.pdf [file d3nj03027j1.pdf]

## Supporting Information

for paper

### **Synthesis, structural features, magnetic properties and thermal decomposition of a new series of polymeric Ln(III)-Cr(III) cyclopropane-1,1-dicarboxylates**

Evgeniya S. Bazhina<sup>a,\*</sup>, Maxim A. Shmelev<sup>a</sup>, Julia K. Voronina<sup>a</sup>, Natalia A. Korotkova<sup>a</sup>, Konstantin A. Babeshkin<sup>a</sup>, Anna K. Matiukhina<sup>a</sup>, Ekaterina V. Belova<sup>b</sup>, Natalia V. Gogoleva<sup>a</sup>, Sergey Yu. Kottsov<sup>a</sup>, Nikolay N. Efimov<sup>a</sup>, Mikhail A. Kiskin<sup>a</sup>, and Igor L. Eremenko<sup>a</sup>

<sup>a</sup> *N.S. Kurnakov Institute of General and Inorganic Chemistry of the Russian Academy of Sciences, Leninsky prosp. 31, Moscow 119991, Russian Federation*

*E-mail: [evgenia-VO@mail.ru](mailto:evgenia-VO@mail.ru)*

<sup>b</sup> *M.V. Lomonosov Moscow State University, Department of Chemistry, Leninskie Gory 1/3, 119991 Moscow, Russian Federation*

## I. X-ray powder diffraction patterns

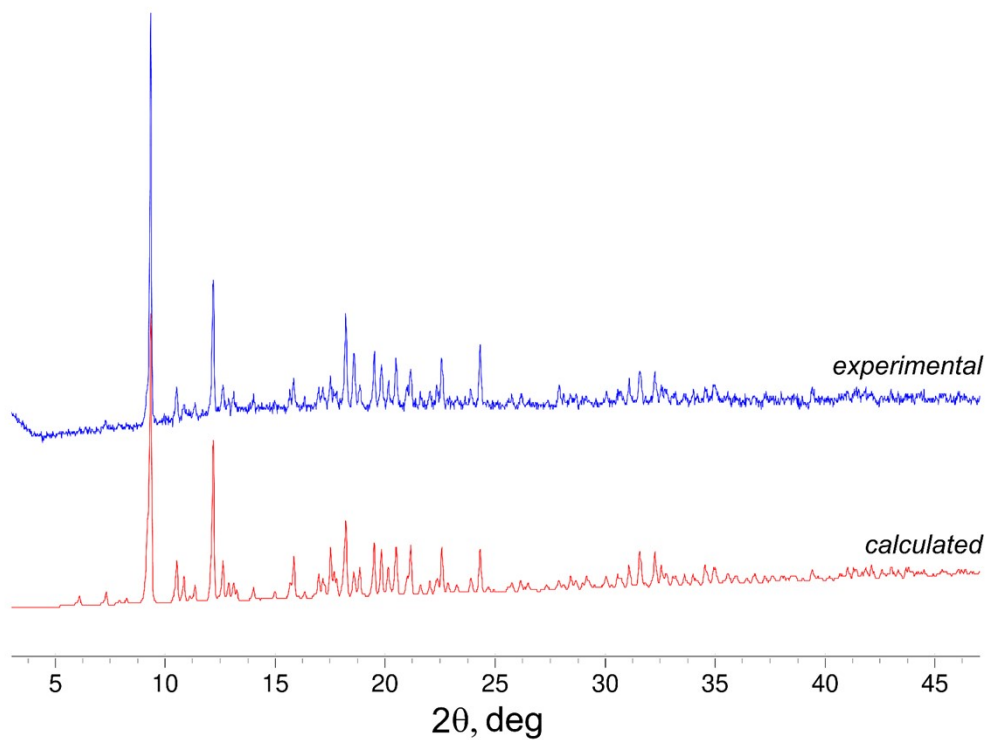

**Fig. S1.** The experimental PXRD pattern for  $1_{Eu}$  measured at 295 K and its comparison with calculated data for  $1_{Eu}$ .

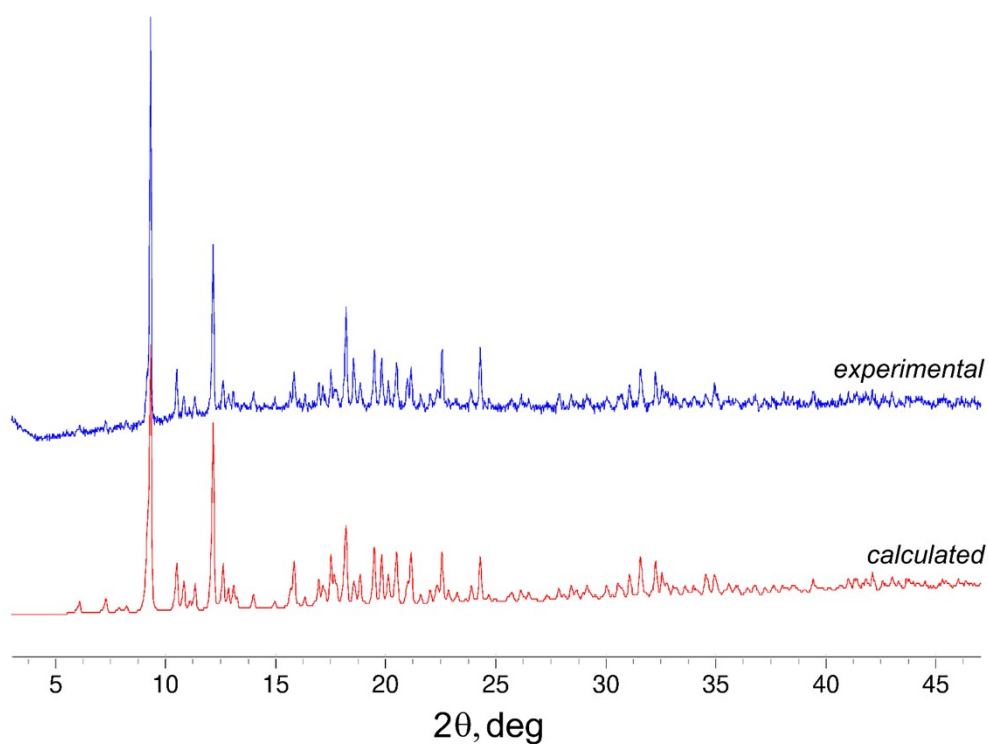

**Fig. S2.** The experimental PXRD pattern for  $1_{Gd}$  measured at 295 K and its comparison with calculated data for  $1_{Gd}$ .

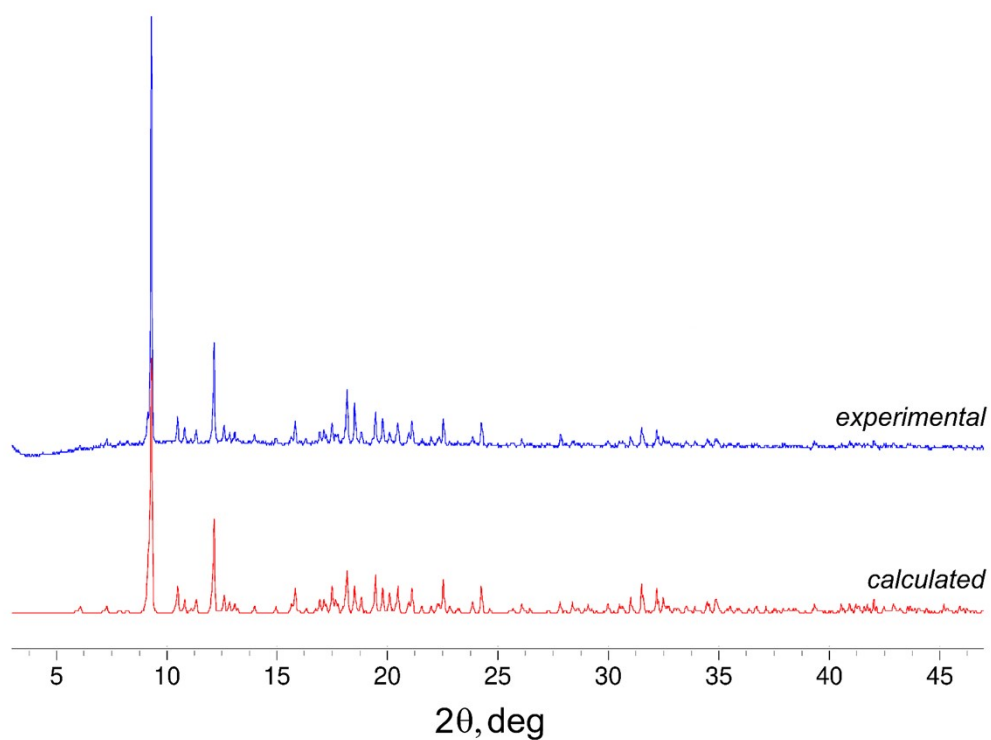

**Fig. S3.** The experimental PXR D pattern for  $1_{\text{Tb}}$  measured at 295 K and its comparison with calculated data for  $1_{\text{Tb}}$ .

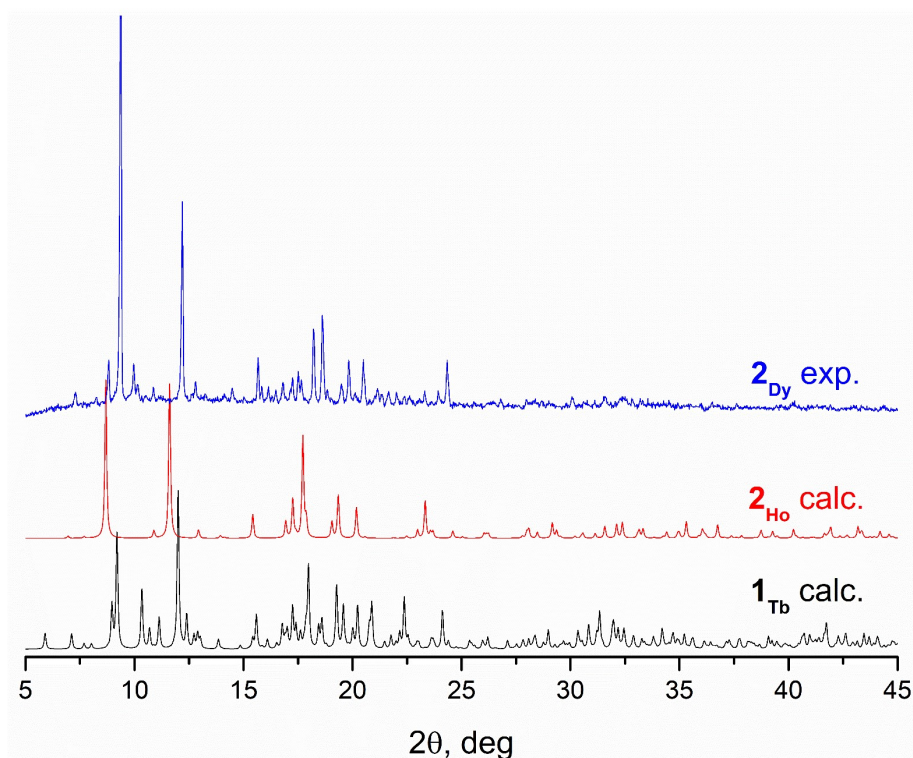

**Fig. S4.** The experimental PXR D pattern for  $2_{\text{Dy}}$  measured at 295 K and its comparison with data calculated from single-crystal XRD for  $1_{\text{Tb}}$  and  $2_{\text{Ho}}$ .

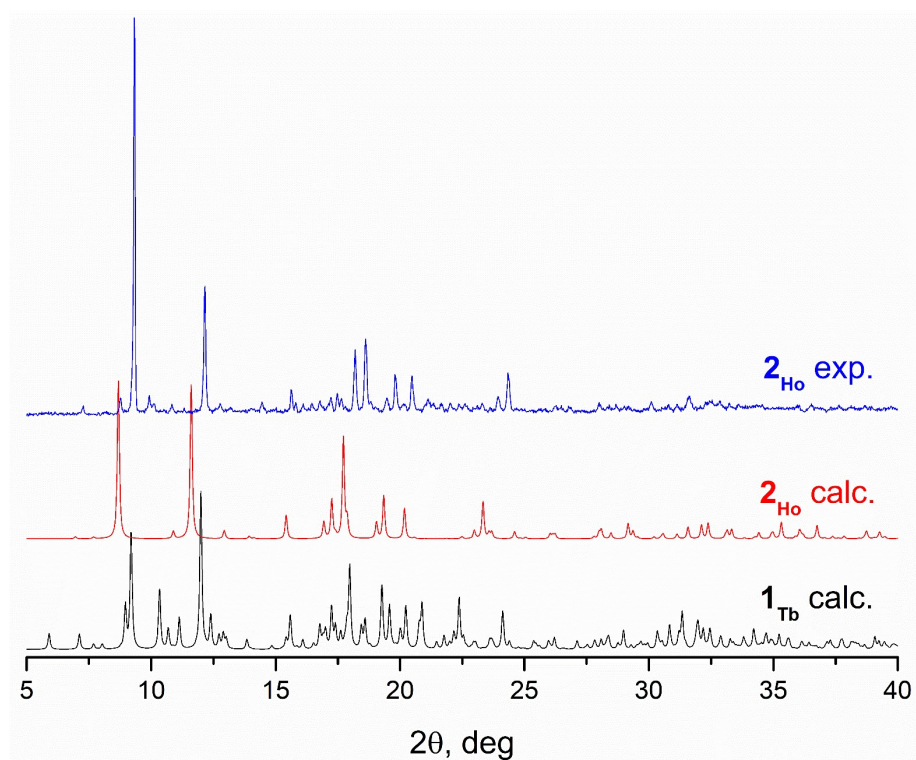

**Fig. S5.** The experimental powder XRD pattern for **2<sub>Ho</sub>** measured at 295 K and its comparison with data calculated from single-crystal XRD for **1<sub>Tb</sub>** and **2<sub>Ho</sub>**.

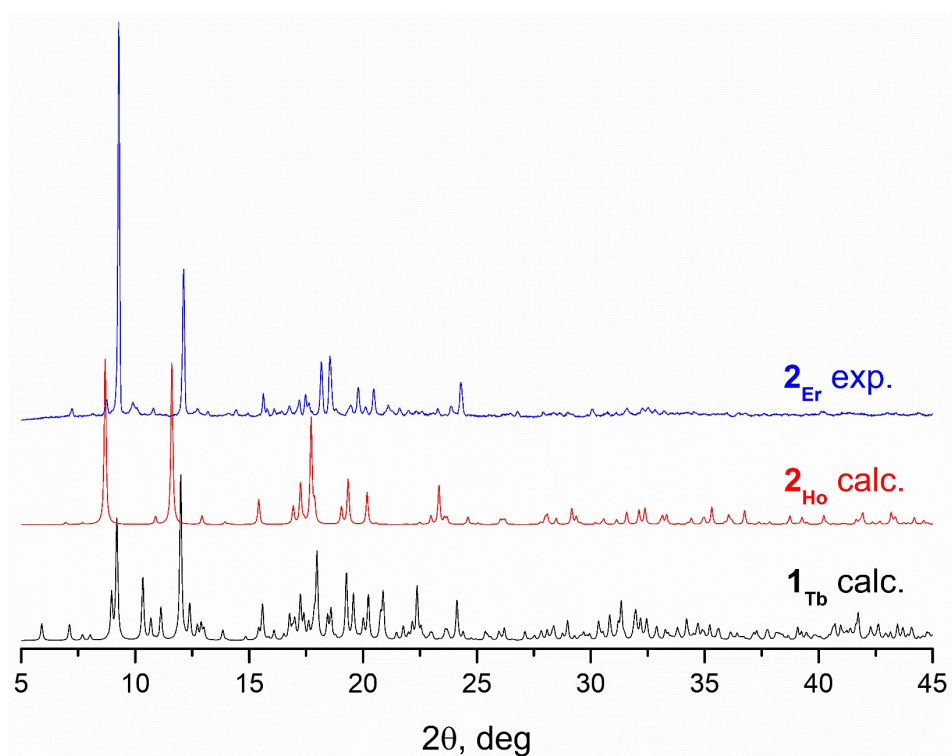

**Fig. S6.** The experimental powder XRD pattern for **2<sub>Er</sub>** measured at 295 K and its comparison with data calculated from single-crystal XRD for **1<sub>Tb</sub>** and **2<sub>Ho</sub>**.

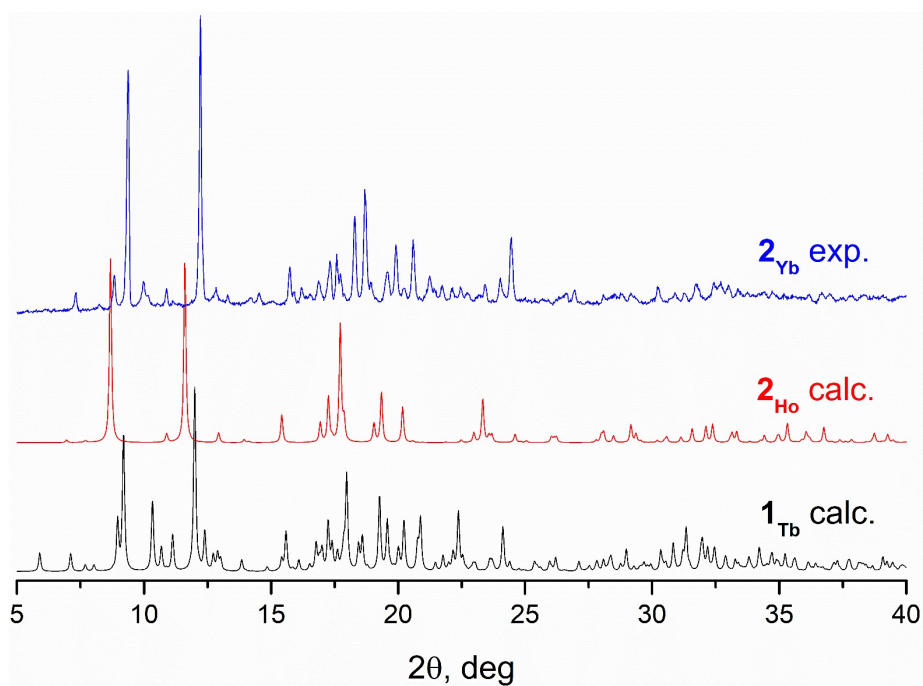

**Fig. S7.** The experimental powder XRD pattern for  $2_{Yb}$  measured at 295 K and its comparison with data calculated from single-crystal XRD for  $1_{Tb}$  and  $2_{Ho}$ .

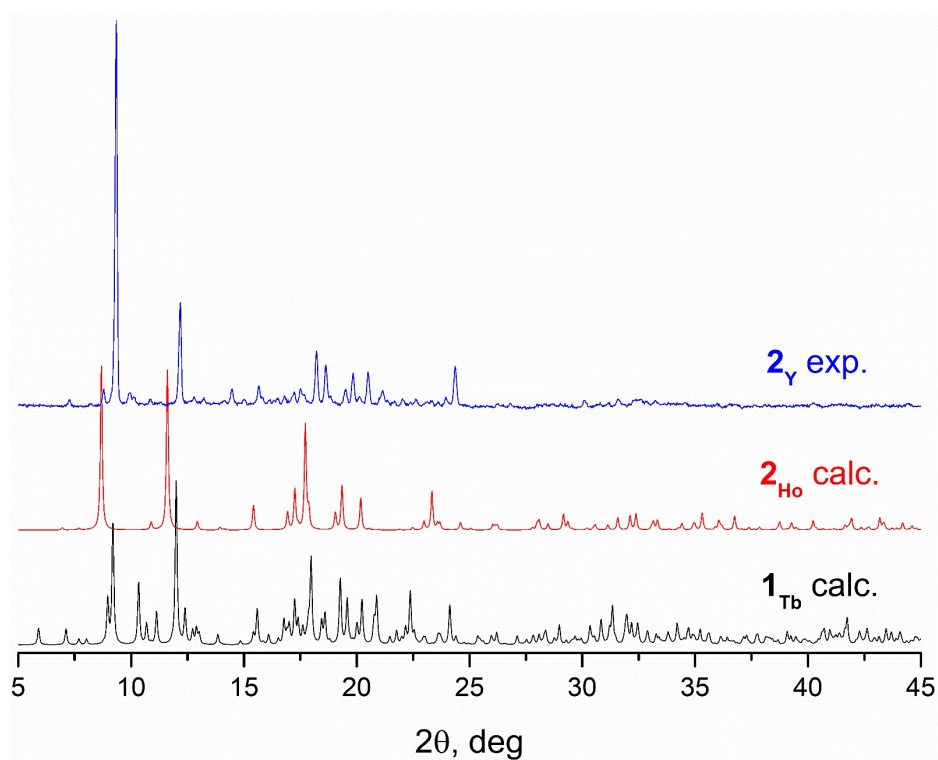

**Fig. S8.** The experimental powder XRD pattern for  $2_Y$  measured at 295 K and its comparison with data calculated from single-crystal XRD for  $1_{Tb}$  and  $2_{Ho}$ .

## II. The description of crystal structures

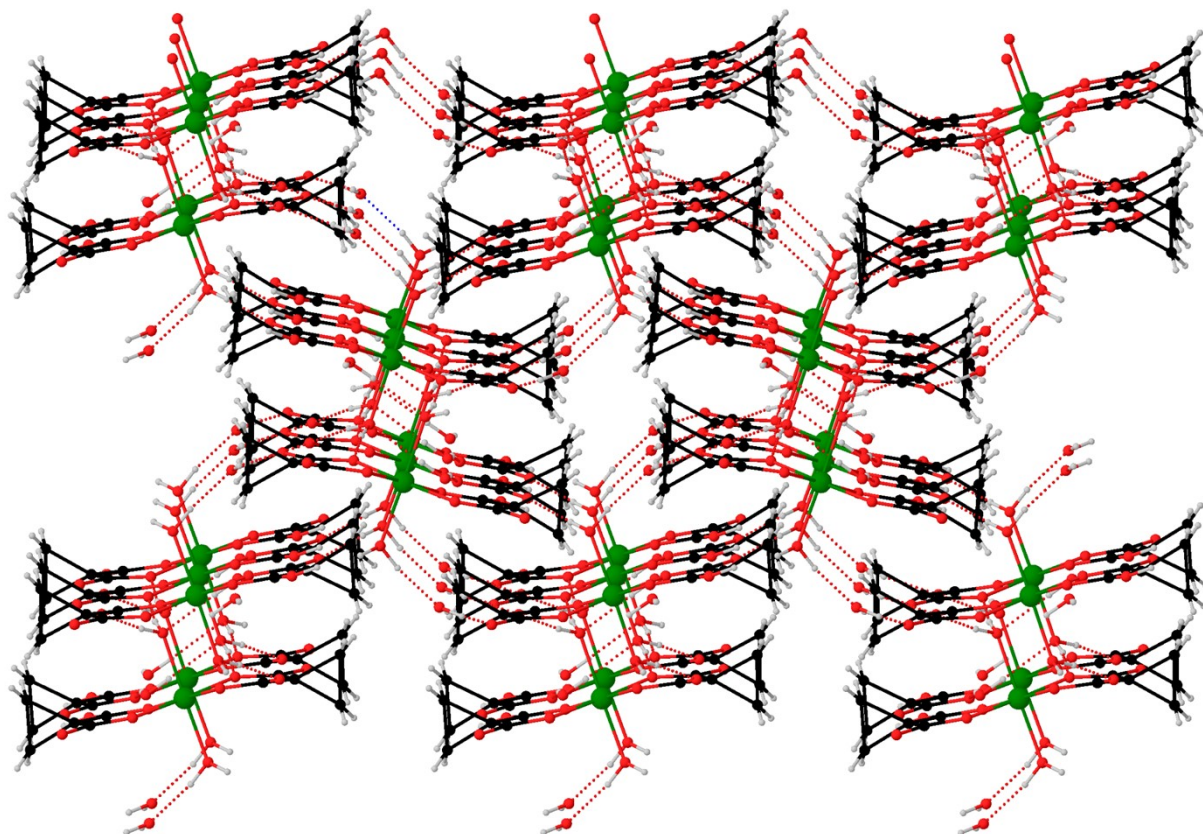

Fig. S9. The fragment of crystal packing of compound 3.

Table S1. Continuous shape measures (CShM) for LnO<sub>8</sub> coordination polyhedra in compounds **1<sub>Eu</sub>**, **1<sub>Gd</sub>**, **1<sub>Tb</sub>**. The lowest SHAPE values are shown highlighted indicating best fits.

| Structure,<br>Ln           | SAPR-8       | TDD-8 | JBTPR-8 | BTPR-8       | JSD-8 |
|----------------------------|--------------|-------|---------|--------------|-------|
| <b>1<sub>Eu</sub>, Eu1</b> | 2.378        | 1.149 | 1.627   | <b>0.952</b> | 3.224 |
| <b>1<sub>Eu</sub>, Eu2</b> | <b>0.773</b> | 1.040 | 1.890   | 1.325        | 3.488 |
| <b>1<sub>Gd</sub>, Gd1</b> | 2.290        | 1.099 | 1.655   | <b>0.948</b> | 3.261 |
| <b>1<sub>Gd</sub>, Gd2</b> | <b>0.761</b> | 1.076 | 1.860   | 1.313        | 3.499 |
| <b>1<sub>Tb</sub>, Tb1</b> | 2.238        | 1.126 | 1.674   | <b>0.955</b> | 3.359 |
| <b>1<sub>Tb</sub>, Tb2</b> | <b>0.670</b> | 1.151 | 1.877   | 1.336        | 3.558 |

Codes:

SAPR-8 (D<sub>4d</sub>) Square antiprism;

TDD-8 (D<sub>2d</sub>) Triangular dodecahedron;

JBTPR-8 (C<sub>2v</sub>) Biaugmented trigonal prism J50;

BTPR-8 (C<sub>2v</sub>) Biaugmented trigonal prism;

JSD-8 (D<sub>2d</sub>) Snub diphenoid J84.

**Table S2.** Selected bond angles  $\omega$  (deg.) for  $1_{\text{Eu}}$ .

| Angle                                         | $\omega$   | Angle                           | $\omega$   |
|-----------------------------------------------|------------|---------------------------------|------------|
| O7A–Eu1–O11A <sup>(i)</sup>                   | 87.63(12)  | O3A–Eu2–O8A <sup>(i)</sup>      | 73.01(12)  |
| O7A–Eu1–O1                                    | 73.73(12)  | O3A–Eu2–O3B                     | 74.76(12)  |
| O7A–Eu1–O2                                    | 80.84(12)  | O3A–Eu2–O12B <sup>(iii)</sup>   | 111.71(12) |
| O7A–Eu1–O3                                    | 143.51(11) | O3A–Eu2–O6                      | 74.81(12)  |
| O7A–Eu1–O4                                    | 87.53(12)  | O3A–Eu2–O7                      | 142.23(12) |
| O7A–Eu1–O5                                    | 74.01(11)  | O3A–Eu2–O8                      | 143.30(13) |
| O11Ai–Eu1–O5                                  | 69.74(13)  | O3A–Eu2–O9                      | 85.70(13)  |
| O11B <sup>(ii)</sup> –Eu1–O7A                 | 146.20(12) | O8A <sup>(i)</sup> –Eu2–O6      | 135.69(12) |
| O11B <sup>(ii)</sup> –Eu1–O11A <sup>(i)</sup> | 112.49(12) | O8A <sup>(i)</sup> –Eu2–O8      | 74.45(12)  |
| O11B <sup>(ii)</sup> –Eu1–O1                  | 73.96(12)  | O8A <sup>(i)</sup> –Eu2–O9      | 79.39(12)  |
| O11B <sup>(ii)</sup> –Eu1–O2                  | 80.99(12)  | O3B–Eu2–O8Ai                    | 123.50(12) |
| O11B <sup>(ii)</sup> –Eu1–O3                  | 69.84(12)  | O3B–Eu2–O12B <sup>(iii)</sup>   | 72.53(12)  |
| O11B <sup>(ii)</sup> –Eu1–O4                  | 91.54(13)  | O3B–Eu2–O6                      | 74.71(13)  |
| O11B <sup>(ii)</sup> –Eu1–O5                  | 137.42(12) | O3B–Eu2–O8                      | 139.23(12) |
| O1–Eu1–O11A <sup>(i)</sup>                    | 141.85(12) | O3B–Eu2–O9                      | 141.79(12) |
| O1–Eu1–O5                                     | 132.09(12) | O12B <sup>(iii)</sup> –Eu2–O8Ai | 78.09(12)  |
| O2–Eu1–O11A <sup>(i)</sup>                    | 70.38(11)  | O12B <sup>(iii)</sup> –Eu2–O6   | 143.09(13) |
| O2–Eu1–O1                                     | 73.91(12)  | O12B <sup>(iii)</sup> –Eu2–O8   | 77.20(12)  |
| O2–Eu1–O3                                     | 122.32(12) | O12B <sup>(iii)</sup> –Eu2–O9   | 145.67(12) |
| O2–Eu1–O5                                     | 133.18(12) | O7–Eu2–O8Ai                     | 144.74(13) |
| O3–Eu1–O11A <sup>(i)</sup>                    | 76.49(11)  | O7–Eu2–O3B                      | 78.06(12)  |
| O3–Eu1–O1                                     | 136.18(12) | O7–Eu2–O12B <sup>(iii)</sup>    | 83.91(13)  |
| O3–Eu1–O5                                     | 69.70(11)  | O7–Eu2–O6                       | 73.06(13)  |
| O4–Eu1–O11A <sup>(i)</sup>                    | 141.86(13) | O7–Eu2–O8                       | 72.10(12)  |
| O4–Eu1–O1                                     | 71.59(13)  | O7–Eu2–O9                       | 100.38(13) |
| O4–Eu1–O2                                     | 145.44(12) | O8–Eu2–O6                       | 120.27(12) |
| O4–Eu1–O3                                     | 85.39(13)  | O8–Eu2–O9                       | 72.00(12)  |
| O4–Eu1–O5                                     | 72.55(13)  | O9–Eu2–O6                       | 68.54(12)  |

Symmetry codes: (i)  $x-1/2, -y+1/2, -z+1/4$ ; (ii)  $-y+1, -x+1, -z+1/2$ ; (iii)  $x-1/2, -y+3/2, -z+1/4$ .**Table S3.** Selected bond angles  $\omega$  (deg.) for  $1_{\text{Gd}}$ .

| Angle                      | $\omega$   | Angle                        | $\omega$   |
|----------------------------|------------|------------------------------|------------|
| O1–Gd1–O5                  | 131.53(19) | O3A–Gd2–O3B                  | 111.68(18) |
| O1–Gd1–O11A <sup>(i)</sup> | 142.03(17) | O3A–Gd2–O6                   | 142.00(18) |
| O2–Gd1–O1                  | 74.38(17)  | O3A–Gd2–O7                   | 143.20(19) |
| O2–Gd1–O3                  | 146.34(19) | O3A–Gd2–O8A <sup>(iii)</sup> | 73.01(18)  |
| O2–Gd1–O4                  | 122.46(18) | O3A–Gd2–O8                   | 85.28(19)  |
| O2–Gd1–O5                  | 133.49(18) | O3A–Gd2–O9                   | 74.93(17)  |
| O2–Gd1–O11A <sup>(i)</sup> | 70.14(17)  | O3A–Gd2–O12B <sup>(iv)</sup> | 74.57(17)  |
| O3–Gd1–O1                  | 72.00(19)  | O3B–Gd2–O7                   | 77.57(18)  |
| O3–Gd1–O4                  | 84.37(19)  | O3B–Gd2–O8A <sup>(iii)</sup> | 78.04(18)  |
| O3–Gd1–O5                  | 71.7(2)    | O3B–Gd2–O8                   | 146.13(18) |

|                                              |            |                                                |            |
|----------------------------------------------|------------|------------------------------------------------|------------|
| O3–Gd1–O11A <sup>(i)</sup>                   | 141.42(19) | O3B–Gd2–O9                                     | 142.38(18) |
| O4–Gd1–O1                                    | 136.06(17) | O6–Gd2–O3B                                     | 84.3(2)    |
| O4–Gd1–O5                                    | 69.48(17)  | O6–Gd2–O7                                      | 72.25(18)  |
| O4–Gd1–O11A <sup>(i)</sup>                   | 76.68(16)  | O6–Gd2–O8A <sup>(iii)</sup>                    | 144.98(19) |
| O4B–Gd1–O1                                   | 74.04(17)  | O6–Gd2–O8                                      | 100.29(19) |
| O4B–Gd1–O2                                   | 80.98(18)  | O6–Gd2–O9                                      | 72.36(19)  |
| O4B–Gd1–O3                                   | 91.45(18)  | O7–Gd2–O8                                      | 72.16(18)  |
| O4B–Gd1–O4                                   | 70.01(17)  | O7–Gd2–O9                                      | 120.30(17) |
| O4B–Gd1–O5                                   | 137.29(18) | O8A <sup>(iii)</sup> –Gd2–O7                   | 74.53(18)  |
| O4B–Gd1–O11A <sup>(i)</sup>                  | 112.44(17) | O8A <sup>(iii)</sup> –Gd2–O8                   | 79.56(18)  |
| O7A <sup>(ii)</sup> –Gd1–O1                  | 73.49(18)  | O8A <sup>(iii)</sup> –Gd2–O9                   | 136.30(18) |
| O7A <sup>(ii)</sup> –Gd1–O2                  | 80.69(17)  | O8–Gd2–O9                                      | 68.89(18)  |
| O7A <sup>(ii)</sup> –Gd1–O3                  | 88.17(18)  | O12B <sup>(iv)</sup> –Gd2–O3B                  | 72.37(18)  |
| O7A <sup>(ii)</sup> –Gd1–O4                  | 143.59(17) | O12B <sup>(iv)</sup> –Gd2–O6                   | 78.39(18)  |
| O7A <sup>(ii)</sup> –Gd1–O4B                 | 145.94(18) | O12B <sup>(iv)</sup> –Gd2–O7                   | 139.59(18) |
| O7A <sup>(ii)</sup> –Gd1–O5                  | 74.33(17)  | O12B <sup>(iv)</sup> –Gd2–O8A <sup>(iii)</sup> | 123.13(18) |
| O7A <sup>(ii)</sup> –Gd1–O11A <sup>(i)</sup> | 87.6(17)   | O12B <sup>(iv)</sup> –Gd2–O8                   | 141.49(18) |
| O11A <sup>(i)</sup> –Gd1–O5                  | 70.26(19)  | O12B <sup>(iv)</sup> –Gd2–O9                   | 74.27(18)  |

Symmetry code(s): (i)  $-y+1, -x+1, -z+1/2$ ; (ii)  $-y+3/2, x+1/2, z-1/4$ ; (iii)  $-x+1/2, y+1/2, -z+3/4$ ; (iv)  $-x+3/2, y-1/2, -z+3/4$ .

**Table S4.** Selected bond angles  $\omega$  (deg.) for **1<sub>Tb</sub>**.

| Angle                                         | $\omega$   | Angle                                         | $\omega$   |
|-----------------------------------------------|------------|-----------------------------------------------|------------|
| O7A–Tb1–O11A <sup>(i)</sup>                   | 87.25(16)  | O3A–Tb2–O8A <sup>(i)</sup>                    | 73.27(15)  |
| O7A–Tb1–O1                                    | 73.37(16)  | O3A–Tb2–O3B                                   | 74.77(15)  |
| O7A–Tb1–O2                                    | 80.88(15)  | O3A–Tb2–O12B <sup>(iii)</sup>                 | 112.22(15) |
| O7A–Tb1–O3                                    | 143.72(15) | O3A–Tb2–O6                                    | 74.77(15)  |
| O7A–Tb1–O4                                    | 88.41(16)  | O3A–Tb2–O7                                    | 142.30(16) |
| O7A–Tb1–O5                                    | 74.12(15)  | O3A–Tb2–O8                                    | 142.93(16) |
| O11A <sup>(i)</sup> –Tb1–O4                   | 140.53(17) | O3A–Tb2–O9                                    | 84.49(16)  |
| O11A <sup>(i)</sup> –Tb1–O5                   | 69.78(17)  | O8Ai–Tb2–O6                                   | 136.37(15) |
| O11B <sup>(ii)</sup> –Tb1–O7A                 | 145.95(15) | O8Ai–Tb2–O8                                   | 74.35(16)  |
| O11B <sup>(ii)</sup> –Tb1–O11A <sup>(i)</sup> | 112.99(16) | O8Ai–Tb2–O9                                   | 79.37(15)  |
| O11B <sup>(ii)</sup> –Tb1–O1                  | 74.13(16)  | O3B–Tb2–O8A <sup>(i)</sup>                    | 123.14(15) |
| O11B <sup>(ii)</sup> –Tb1–O2                  | 80.77(15)  | O3B–Tb2–O12B <sup>(iii)</sup>                 | 72.76(15)  |
| O11B <sup>(ii)</sup> –Tb1–O3                  | 69.95(15)  | O3B–Tb2–O6                                    | 74.55(16)  |
| O11B <sup>(ii)</sup> –Tb1–O4                  | 91.53(16)  | O3B–Tb2–O8                                    | 139.83(15) |
| O11B <sup>(ii)</sup> –Tb1–O5                  | 137.48(16) | O3B–Tb2–O9                                    | 141.39(16) |
| O1–Tb1–O11A <sup>(i)</sup>                    | 141.89(15) | O12B <sup>(iii)</sup> –Tb2–O8A <sup>(i)</sup> | 77.64(15)  |
| O1–Tb1–O4                                     | 72.77(16)  | O12B <sup>(iii)</sup> –Tb2–O6                 | 142.94(16) |
| O1–Tb1–O5                                     | 131.49(17) | O12B <sup>(iii)</sup> –Tb2–O8                 | 77.46(15)  |
| O2–Tb1–O11A <sup>(i)</sup>                    | 70.53(15)  | O12B <sup>(iii)</sup> –Tb2–O9                 | 145.85(15) |
| O2–Tb1–O1                                     | 74.13(15)  | O7–Tb2–O8A <sup>(i)</sup>                     | 144.40(16) |
| O2–Tb1–O3                                     | 121.78(16) | O7–Tb2–O3B                                    | 78.17(15)  |
| O2–Tb1–O4                                     | 146.87(16) | O7–Tb2–O12B <sup>(iii)</sup>                  | 83.56(17)  |



|                            |            |           |            |
|----------------------------|------------|-----------|------------|
| O2–Tb1–O5                  | 133.56(16) | O7–Tb2–O6 | 73.04(16)  |
| O3–Tb1–O11A <sup>(i)</sup> | 76.36(15)  | O7–Tb2–O8 | 72.20(16)  |
| O3–Tb1–O1                  | 136.56(15) | O7–Tb2–O9 | 101.40(17) |
| O3–Tb1–O4                  | 84.47(16)  | O8–Tb2–O6 | 119.92(16) |
| O3–Tb1–O5                  | 69.88(16)  | O8–Tb2–O9 | 72.21(15)  |
| O4–Tb1–O5                  | 71.30(18)  | O9–Tb2–O6 | 68.68(16)  |

Symmetry code(s): (i)  $x+1/2, -y-1/2, -z-1/4$ ; (ii)  $-y-1, -x-1, -z-1/2$ ; (iii)  $x+1/2, -y-3/2, -z-1/4$ .

**Table S5.** Hydrogen bond parameters in structure **1Eu**.

| Fragment D–H···A                | Distance/ Å |       |           | D–H···A /° |
|---------------------------------|-------------|-------|-----------|------------|
|                                 | D–H         | H···A | D···A     |            |
| O1–H1A···O12A <sup>(i)</sup>    | 0.98        | 1.76  | 2.729(5)  | 167        |
| O1–H1B···O2S <sup>(i)</sup>     | 0.88        | 1.79  | 2.651(5)  | 168        |
| O2–H2A···O2S <sup>(i)</sup>     | 0.98        | 1.86  | 2.721(5)  | 145        |
| O2–H2B···O4B <sup>(ii)</sup>    | 0.85        | 1.91  | 2.741(5)  | 166        |
| O3–H3A···O5                     | 0.98        | 2.38  | 2.787(5)  | 104        |
| O3–H3A···O9                     | 0.98        | 2.17  | 3.151(5)  | 179        |
| O3–H3B···O6S <sup>(i)</sup>     | 0.98        | 1.68  | 2.660(5)  | 180        |
| O4–H4A···O1S                    | 0.98        | 1.79  | 2.771(5)  | 179        |
| O4–H4B···O4S <sup>(i)</sup>     | 0.80        | 1.93  | 2.719(5)  | 167        |
| O5–H5A···O5A                    | 0.84        | 1.94  | 2.749(4)  | 162        |
| O5–H5A···O7A                    | 0.84        | 2.57  | 2.918(5)  | 106        |
| O5–H5B···O9                     | 0.86        | 1.97  | 2.822(5)  | 175        |
| O6–H6A···O4S                    | 0.84        | 1.94  | 2.749(5)  | 163        |
| O6–H6A···O7                     | 0.84        | 2.54  | 2.887(5)  | 106        |
| O6–H6B···O1A                    | 0.86        | 2.09  | 2.866(4)  | 151        |
| O7–H7A···O1B                    | 0.98        | 1.81  | 2.788(4)  | 180        |
| O7–H7A···O3B                    | 0.98        | 2.39  | 2.989(5)  | 119        |
| O7–H7B···O3S                    | 0.98        | 1.65  | 2.630(6)  | 179        |
| O8–H8A···O5S                    | 0.84        | 1.87  | 2.703(6)  | 176        |
| O8–H8A···O9                     | 0.84        | 2.55  | 2.870(5)  | 104        |
| O8–H8B···O10B <sup>(iii)</sup>  | 0.84        | 1.98  | 2.751(4)  | 154        |
| O9–H9A···O5S                    | 0.98        | 2.54  | 2.872(6)  | 100        |
| O9–H9A···O6A <sup>(ii)</sup>    | 0.98        | 2.00  | 2.983(4)  | 180        |
| O9–H9A···O8A <sup>(ii)</sup>    | 0.98        | 2.46  | 3.095(5)  | 122        |
| O9–H9B···O8S <sup>(i)</sup>     | 0.98        | 1.96  | 2.919(12) | 164        |
| O9–H9B···O8' <sup>(i)</sup>     | 0.98        | 1.77  | 2.683(16) | 154        |
| O1S–H1SA···O12A                 | 0.89        | 1.93  | 2.808(4)  | 166        |
| O1S–H1SB···O12A                 | 1.15        | 1.75  | 2.808(4)  | 150        |
| O2S–H2SA···O8B <sup>(iv)</sup>  | 0.98        | 1.85  | 2.742(5)  | 150        |
| O2S–H2SB···O4A <sup>(v)</sup>   | 0.98        | 1.95  | 2.836(5)  | 149        |
| O3S–H3SA···O2B <sup>(iii)</sup> | 0.95        | 2.02  | 2.960(6)  | 170        |
| O3S–H3SA···O4B <sup>(iii)</sup> | 0.95        | 2.50  | 2.996(6)  | 113        |
| O3S–H3SB···O7S                  | 0.98        | 2.49  | 2.942(8)  | 108        |

|                                  |      |      |           |      |
|----------------------------------|------|------|-----------|------|
| O3S–H3SB···O10S                  | 0.98 | 2.47 | 2.905(8)  | 106' |
| O3S–H3SB···O7'                   | 0.98 | 2.56 | 3.076(10) | 113  |
| O3S–H3SB···O9S <sup>(vi)</sup>   | 0.98 | 2.30 | 3.243(10) | 161  |
| O3S–H3SB···O9' <sup>(vi)</sup>   | 0.98 | 2.26 | 3.236(16) | 175  |
| O3S–H3SB···O9' <sup>(iii)</sup>  | 0.98 | 2.46 | 2.910(17) | 108  |
| O4S–H4SA···O8S                   | 0.80 | 1.92 | 2.706(12) | 165  |
| O4S–H4SA···O8'                   | 0.80 | 2.08 | 2.820(15) | 153  |
| O4S–H4SB···O1B                   | 0.80 | 2.47 | 3.123(5)  | 139  |
| O4S–H4SB···O9B                   | 0.80 | 2.17 | 2.859(4)  | 144  |
| O5S–H5SA···O2A <sup>(ii)</sup>   | 0.98 | 1.97 | 2.798(6)  | 140  |
| O5S–H5SB···O7S <sup>(i)</sup>    | 0.95 | 1.88 | 2.685(8)  | 140  |
| O5S–H5SB···O7' <sup>(i)</sup>    | 0.95 | 1.78 | 2.694(9)  | 161  |
| O6S–H6SA···O5B                   | 0.98 | 1.82 | 2.797(5)  | 172  |
| O6S–H6SB···O4A <sup>(vii)</sup>  | 0.98 | 1.97 | 2.852(6)  | 148  |
| O7S–H7SA···O7B                   | 1.09 | 1.76 | 2.828(8)  | 163  |
| O7S–H7SB···O6S                   | 0.95 | 2.22 | 3.168(8)  | 178  |
| O8S–H8SA···O7S                   | 0.87 | 1.94 | 2.715(15) | 148  |
| O8S–H8SA···O10S                  | 0.87 | 1.96 | 2.391(16) | 109  |
| O8S–H8SA···O7'                   | 0.87 | 2.58 | 3.360(17) | 149  |
| O8S–H8SB···O8S <sup>(i)</sup>    | 0.87 | 2.21 | 3.042(17) | 160  |
| O9S–H9SA···O8B                   | 0.98 | 1.82 | 2.774(10) | 164  |
| O9S–H9SB···O3S <sup>(viii)</sup> | 0.95 | 2.29 | 3.243(10) | 178  |
| O9S–H9SB···O7' <sup>(viii)</sup> | 0.95 | 2.58 | 2.951(16) | 104  |
| O9S–H9SB···O9' <sup>(ix)</sup>   | 0.95 | 2.47 | 2.854(17) | 104  |
| C9B–H9BB···O2B <sup>(iii)</sup>  | 0.99 | 2.55 | 3.412(6)  | 146  |

Symmetry codes: (i)  $1-y, 1-x, 1/2-z$ ; (ii)  $-1/2+x, 1/2-y, 1/4-z$ ; (iii)  $-1/2+x, 3/2-y, 1/4-z$ ; (iv)  $1/2+x, 3/2-y, 1/4-z$ ; (v)  $1/2+x, 1/2-y, 1/4-z$ ; (vi)  $-1/2+y, 3/2-x, 1/4+z$ ; (vii)  $1/2+y, 3/2-x, 1/4+z$ ; (viii)  $3/2-y, 1/2+x, -1/4+z$ ; (ix)  $y, x, -z$ .

**Table S6.** Hydrogen bond parameters in structure **1<sub>Gd</sub>**.

| Fragment D–H···A               | Distance/ Å |       |          | D–H···A /° |
|--------------------------------|-------------|-------|----------|------------|
|                                | D–H         | H···A | D···A    |            |
| O1–H1A···O2                    | 0.87        | 2.55  | 2.886(7) | 104        |
| O1–H1A···O5S <sup>(i)</sup>    | 0.87        | 1.79  | 2.659(7) | 180        |
| O1–H1B···O12A <sup>(ii)</sup>  | 0.87        | 1.91  | 2.728(7) | 156        |
| O2–H2A···O11B <sup>(iii)</sup> | 0.98        | 1.80  | 2.738(8) | 158        |
| O2–H2B···O5S <sup>(i)</sup>    | 0.98        | 1.79  | 2.729(8) | 158        |
| O3–H3A···O6S <sup>(ii)</sup>   | 0.87        | 1.79  | 2.653(8) | 173        |
| O3–H3B···O1                    | 0.87        | 2.50  | 2.813(7) | 102        |
| O3–H3B···O1S <sup>(iv)</sup>   | 0.87        | 2.13  | 2.766(8) | 129        |
| O4–H4A···O4B                   | 0.87        | 2.35  | 2.734(7) | 107        |
| O4–H4A···O4S                   | 0.87        | 1.90  | 2.665(8) | 147        |
| O4–H4B···O9A <sup>(v)</sup>    | 0.87        | 1.92  | 2.710(6) | 150        |
| O5–H5A···O5A <sup>(iv)</sup>   | 0.87        | 1.87  | 2.742(8) | 179        |
| O5–H5A···O7A <sup>(iv)</sup>   | 0.87        | 2.38  | 2.909(8) | 119        |

|                                  |      |      |           |     |
|----------------------------------|------|------|-----------|-----|
| O5–H5B···O8 <sup>(iv)</sup>      | 0.87 | 2.26 | 2.811(8)  | 122 |
| O6–H6A···O2S                     | 0.87 | 1.80 | 2.643(8)  | 162 |
| O6–H6A···O7                      | 0.87 | 2.45 | 2.825(7)  | 107 |
| O6–H6B···O10B <sup>(i)</sup>     | 0.87 | 2.17 | 2.789(7)  | 127 |
| O7–H7A···O3S                     | 0.96 | 1.82 | 2.701(9)  | 150 |
| O7–H7B···O1B                     | 0.79 | 2.00 | 2.754(8)  | 161 |
| O8–H8A···O8S                     | 0.87 | 1.95 | 2.805(10) | 165 |
| O8–H8B···O3S                     | 0.87 | 2.16 | 2.863(8)  | 138 |
| O8–H8B···O6A <sup>(vi)</sup>     | 0.87 | 2.30 | 2.983(7)  | 135 |
| O9–H9A···O1A                     | 0.98 | 2.03 | 2.861(7)  | 140 |
| O9–H9B···O6S                     | 0.98 | 1.81 | 2.753(8)  | 160 |
| O1S–H1SA···O12A                  | 0.88 | 2.14 | 2.814(7)  | 133 |
| O1S–H1SB···O12A <sup>(vii)</sup> | 0.88 | 2.14 | 2.814(7)  | 133 |
| O2S–H2SA···O7S                   | 0.82 | 2.16 | 2.962(10) | 166 |
| O2S–H2SA···O8S'                  | 0.82 | 2.60 | 2.936(13) | 106 |
| O2S–H2SB···O8S'                  | 0.87 | 2.56 | 2.936(13) | 107 |
| O2S–H2SB···O9S'                  | 0.87 | 2.15 | 2.99(3)   | 163 |
| O3S–H3SA···O2A <sup>(vi)</sup>   | 0.87 | 1.95 | 2.803(8)  | 166 |
| O3S–H3SA···O6A <sup>(vi)</sup>   | 0.87 | 2.47 | 2.965(8)  | 117 |
| O3S–H3SB···O5S                   | 0.87 | 2.41 | 3.209(8)  | 152 |
| O3S–H3SB···O7S <sup>(vii)</sup>  | 0.87 | 2.23 | 2.675(9)  | 112 |
| O4S–H4SA···O2B                   | 0.87 | 2.57 | 3.304(8)  | 143 |
| O4S–H4SA···O6B                   | 0.87 | 2.13 | 2.799(7)  | 134 |
| O4S–H4SB···O4A <sup>(v)</sup>    | 0.87 | 2.15 | 2.839(8)  | 136 |
| O5S–H5SA···O7B                   | 0.87 | 1.97 | 2.743(9)  | 147 |
| O5S–H5SB···O4A <sup>(vi)</sup>   | 0.87 | 2.06 | 2.847(8)  | 149 |
| O6S–H6SA···O8S <sup>(vii)</sup>  | 0.87 | 2.00 | 2.727(11) | 140 |
| O6S–H6SB···O2B <sup>(i)</sup>    | 0.87 | 2.04 | 2.879(8)  | 162 |
| O7S–H7SA···O4S <sup>(i)</sup>    | 0.99 | 2.33 | 3.164(10) | 141 |
| O7S–H7SA···O8B <sup>(i)</sup>    | 0.99 | 2.11 | 2.765(10) | 122 |
| O7S–H7SB···O8B <sup>(i)</sup>    | 0.99 | 2.28 | 2.765(10) | 109 |
| O8S–H8SA···O8S'                  | 0.74 | 1.90 | 2.58(2)   | 151 |
| O8S–H8SB···O7S <sup>(vii)</sup>  | 0.90 | 1.87 | 2.717(15) | 158 |
| O9S–H9SA···O11B <sup>(vii)</sup> | 0.98 | 2.04 | 3.00(2)   | 163 |
| O9S–H9SB···O7S <sup>(vii)</sup>  | 0.98 | 2.18 | 3.13(2)   | 162 |
| C10B–H10D···O9B <sup>(ii)</sup>  | 0.99 | 2.55 | 3.412(9)  | 146 |

Symmetry codes: (i)  $3/2-x, -1/2+y, 3/4-z$ ; (ii)  $3/2-x, 1/2+y, 3/4-z$ ; (iii)  $3/2-y, -1/2+x, -1/4+z$ ; (iv)  $3/2-y, 1/2+x, -1/4+z$ ; (v)  $1-y, 1-x, 1/2-z$ ; (vi)  $1/2-x, 1/2+y, 3/4-z$ ; (vii)  $y, x, 1-z$ .

**Table S7.** Hydrogen bond parameters in structure **1<sub>Tb</sub>**.

| Fragment D–H···A             | Distance/ Å |       |          | D–H···A /° |
|------------------------------|-------------|-------|----------|------------|
|                              | D–H         | H···A | D···A    |            |
| O1–H1A···O12A <sup>(i)</sup> | 0.98        | 1.77  | 2.735(7) | 167        |

|                                  |      |      |           |     |
|----------------------------------|------|------|-----------|-----|
| O1–H1B···O2S <sup>(i)</sup>      | 0.88 | 1.80 | 2.667(7)  | 167 |
| O1S–H1S···O12A                   | 0.81 | 2.12 | 2.821(6)  | 145 |
| O2–H2A···O7 <sup>(ii)</sup>      | 0.98 | 1.63 | 2.56(9)   | 155 |
| O2–H2A···O2S <sup>(i)</sup>      | 0.98 | 1.85 | 2.730(7)  | 147 |
| O2–H2B···O4B <sup>(iii)</sup>    | 0.86 | 1.90 | 2.739(7)  | 165 |
| O3–H3A···O5                      | 0.98 | 2.36 | 2.768(7)  | 104 |
| O3–H3A···O9                      | 0.98 | 2.18 | 3.158(7)  | 179 |
| O3–H3B···O6S <sup>(i)</sup>      | 0.98 | 1.69 | 2.673(8)  | 178 |
| O4–H4A···O1S                     | 0.92 | 1.86 | 2.754(7)  | 164 |
| O4–H4B···O4S <sup>(i)</sup>      | 1.04 | 1.69 | 2.635(7)  | 148 |
| O5–H5A···O5A                     | 0.84 | 1.93 | 2.742(6)  | 162 |
| O5–H5A···O7A                     | 0.84 | 2.56 | 2.897(7)  | 105 |
| O5–H5B···O9                      | 0.86 | 1.97 | 2.824(7)  | 176 |
| O6–H6A···O4S                     | 0.84 | 1.93 | 2.743(7)  | 162 |
| O6–H6A···O7                      | 0.84 | 2.52 | 2.867(7)  | 106 |
| O6–H6B···O1A                     | 0.86 | 2.08 | 2.870(6)  | 151 |
| O7–H7A···O1B                     | 0.98 | 1.80 | 2.781(7)  | 179 |
| O7–H7A···O3B                     | 0.98 | 2.38 | 2.968(6)  | 118 |
| O7–H7B···O3S                     | 0.98 | 1.66 | 2.640(8)  | 177 |
| O8–H8A···O5S                     | 0.84 | 1.88 | 2.714(8)  | 176 |
| O8–H8A···O9                      | 0.84 | 2.53 | 2.858(7)  | 104 |
| O8–H8B···O10B <sup>(iv)</sup>    | 0.83 | 1.98 | 2.750(6)  | 154 |
| O9–H9A···O6A <sup>(iii)</sup>    | 0.98 | 1.98 | 2.954(6)  | 180 |
| O9–H9A···O8A <sup>(iii)</sup>    | 0.98 | 2.45 | 3.072(6)  | 121 |
| O9–H9B···O8S <sup>(i)</sup>      | 0.98 | 1.99 | 2.941(13) | 164 |
| O9–H9B···O8 <sup>(i)</sup>       | 0.98 | 1.75 | 2.668(16) | 155 |
| O2S–H2SA···O8B <sup>(v)</sup>    | 0.98 | 1.85 | 2.751(7)  | 150 |
| O2S–H2SB···O4A <sup>(vi)</sup>   | 0.98 | 1.99 | 2.867(7)  | 148 |
| O3S–H3SA···O2B <sup>(iv)</sup>   | 0.95 | 2.01 | 2.949(8)  | 169 |
| O3S–H3SA···O4B <sup>(iv)</sup>   | 0.95 | 2.51 | 3.007(8)  | 113 |
| O3S–H3SB···O7S                   | 0.98 | 2.45 | 2.933(10) | 110 |
| O3S–H3SB···O4S'                  | 0.98 | 2.46 | 2.907(13) | 108 |
| O3S–H3SB···O9S <sup>(vii)</sup>  | 0.98 | 2.32 | 3.260(14) | 160 |
| O3S–H3SB···O9 <sup>(vii)</sup>   | 0.98 | 2.25 | 3.23(2)   | 174 |
| O3S–H3SB···O9 <sup>(iv)</sup>    | 0.98 | 2.50 | 2.95(2)   | 108 |
| O4S–H4SA···O8S                   | 0.80 | 1.88 | 2.665(13) | 166 |
| O4S–H4SA···O8'                   | 0.80 | 2.17 | 2.902(17) | 152 |
| O4S–H4SB···O1B                   | 0.80 | 2.51 | 3.162(7)  | 140 |
| O4S–H4SB···O9B                   | 0.80 | 2.23 | 2.925(7)  | 145 |
| O5S–H5SA···O2A <sup>(iii)</sup>  | 0.98 | 1.97 | 2.803(8)  | 141 |
| O5S–H5SB···O7S <sup>(i)</sup>    | 0.95 | 1.85 | 2.689(9)  | 146 |
| O5S–H5SB···O7 <sup>(i)</sup>     | 0.95 | 2.28 | 3.16(8)   | 154 |
| O6S–H6SA···O5B                   | 0.98 | 1.83 | 2.807(7)  | 172 |
| O6S–H6SB···O4A <sup>(viii)</sup> | 0.98 | 1.97 | 2.854(8)  | 149 |

|                                |      |      |           |     |
|--------------------------------|------|------|-----------|-----|
| O7S–H7SA···O7B                 | 0.98 | 1.84 | 2.773(9)  | 158 |
| O7S–H7SB···O6S                 | 0.98 | 2.22 | 3.199(10) | 173 |
| O8S–H8SA···O7S                 | 0.87 | 2.11 | 2.892(17) | 149 |
| O8S–H8SA···O4S'                | 0.87 | 2.00 | 2.44(2)   | 110 |
| O8S–H8SB···O8S <sup>(i)</sup>  | 0.87 | 2.22 | 3.05(2)   | 159 |
| O9S–H9SA···O8B                 | 0.98 | 1.82 | 2.778(14) | 165 |
| O9S–H9SB···O3S <sup>(ix)</sup> | 0.95 | 2.31 | 3.260(14) | 178 |
| O9S–H9SB···O9' <sup>(x)</sup>  | 0.95 | 2.46 | 2.86(2)   | 105 |
| C9B–H9BA···O2B <sup>(iv)</sup> | 0.99 | 2.54 | 3.414(8)  | 148 |

Symmetry codes: (i)  $-1-y, -1-x, -1/2-z$ ; (ii)  $x, 1+y, z$ ; (iii)  $1/2+x, -1/2-y, -1/4-z$ ; (iv)  $1/2+x, -3/2-y, -1/4-z$ ; (v)  $-1/2+x, -3/2-y, -1/4-z$ ; (vi)  $-1/2+x, -1/2-y, -1/4-z$ ; (vii)  $1/2+y, -3/2-x, -1/4+z$ ; (viii)  $-1/2+y, -3/2-x, -1/4+z$ ; (ix)  $-3/2-y, -1/2+x, 1/4+z$ ; (x)  $y, x, -z$ .

**Table S8.** Hydrogen bond parameters in structure **3**.

| Fragment D–H···A               | Distance/ Å |       |          | D–H···A /° |
|--------------------------------|-------------|-------|----------|------------|
|                                | D–H         | H···A | D···A    |            |
| O1S–H1S'···O10 <sup>(i)</sup>  | 0.86        | 1.97  | 2.770(3) | 154        |
| O1S–H1S···O9 <sup>(ii)</sup>   | 0.85        | 1.95  | 2.798(3) | 175        |
| O2S–H2S'···O6 <sup>(iii)</sup> | 0.85        | 2.02  | 2.869(3) | 174        |
| O2S–H2S···O1 <sup>(iv)</sup>   | 0.89        | 1.83  | 2.706(2) | 169        |
| O5–H5···O7 <sup>(v)</sup>      | 0.89        | 1.88  | 2.774(3) | 175        |
| O5–H5'···O1S                   | 0.87        | 1.74  | 2.604(3) | 171        |
| O6–H6···O4 <sup>(iii)</sup>    | 0.83        | 1.94  | 2.765(2) | 170        |
| O6–H6'···O9 <sup>(vi)</sup>    | 0.81        | 1.81  | 2.605(2) | 169        |
| O8–H8···O5 <sup>(i)</sup>      | 0.95        | 2.39  | 3.341(3) | 180        |

Symmetry codes: (i)  $1-x, 1/2+y, 3/2-z$ ; (ii)  $2-x, 1/2+y, 3/2-z$ ; (iii)  $1-x, 1-y, 1-z$ ; (iv)  $-1+x, y, z$ ; (v)  $2-x, -1/2+y, 3/2-z$ ; (vi)  $2-x, 1-y, 1-z$ .

### III. Magnetic properties

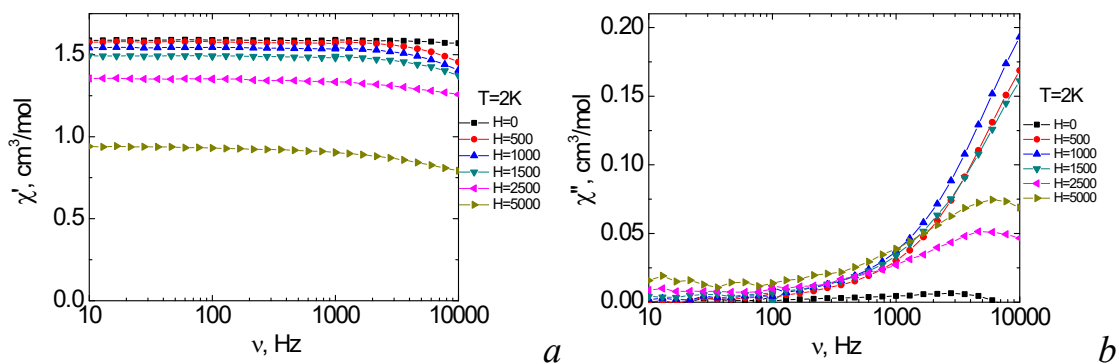

**Fig. S10.** Frequency dependencies of in-phase,  $\chi'$  (a) and out-of-phase,  $\chi''$  (b) components of dynamic magnetic susceptibility for complex  $\mathbf{1}_{Eu}$  at  $T = 2$  K under various dc magnetic fields.

Solid lines are visual guides.

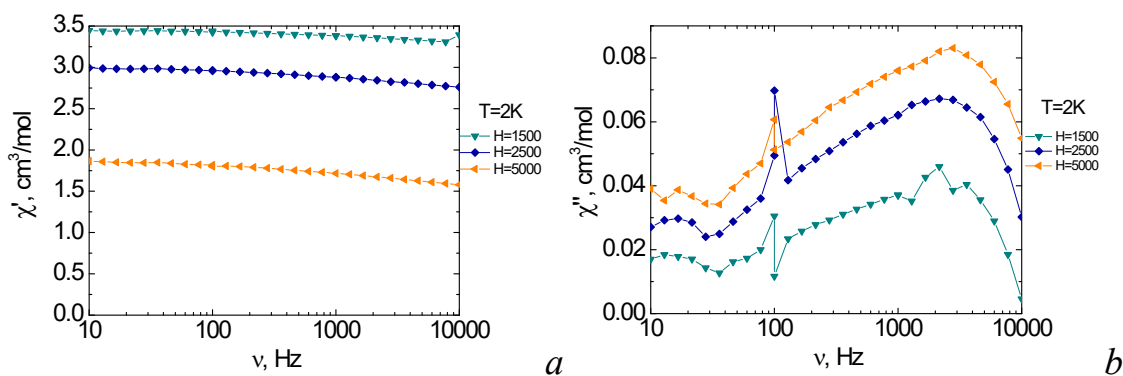

**Fig. S11.** Frequency dependencies of in-phase,  $\chi'$  (a) and out-of-phase,  $\chi''$  (b) components of dynamic magnetic susceptibility for complex  $\mathbf{1}_{Gd}$  at  $T = 2$  K under various dc magnetic fields.

Solid lines are visual guides.

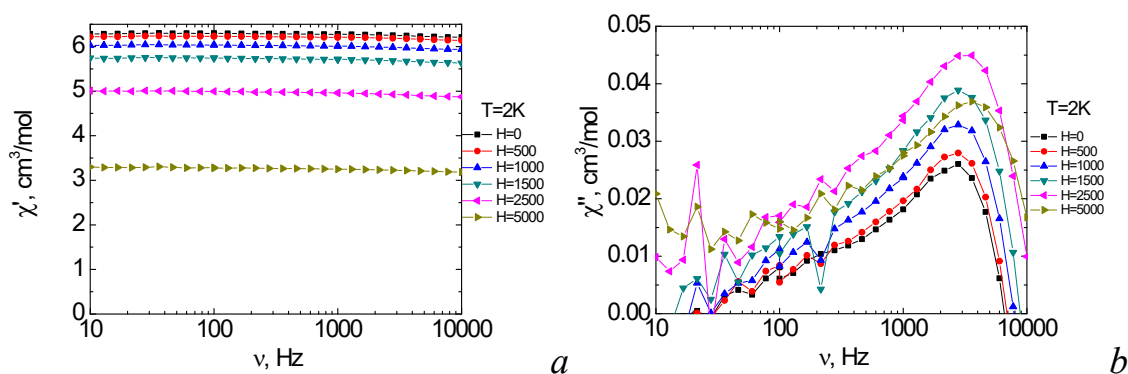

**Fig. S12.** Frequency dependencies of in-phase,  $\chi'$  (a) and out-of-phase,  $\chi''$  (b) components of dynamic magnetic susceptibility for complex  $\mathbf{1}_{Tb}$  at  $T = 2$  K under various dc magnetic fields.

Solid lines are visual guides.

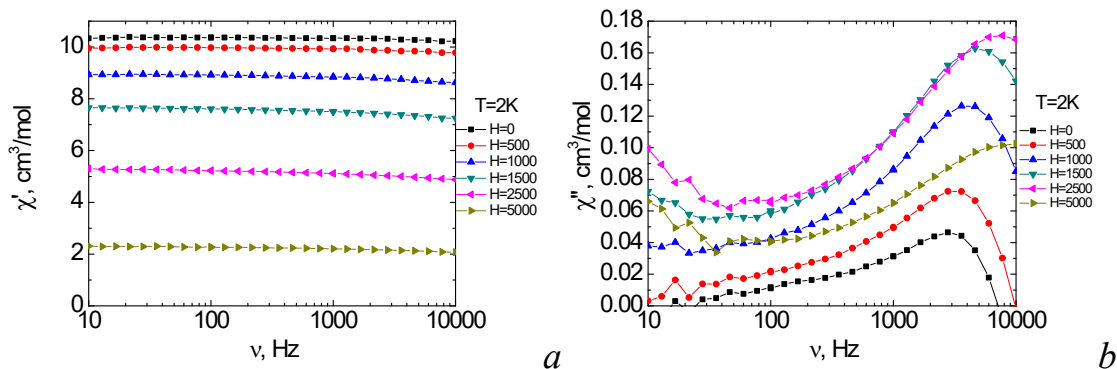

**Fig. S13.** Frequency dependencies of in-phase,  $\chi'$  (a) and out-of-phase,  $\chi''$  (b) components of dynamic magnetic susceptibility for complex  $2_{Dy}$  at  $T = 2$  K under various dc magnetic fields.

Solid lines are visual guides.

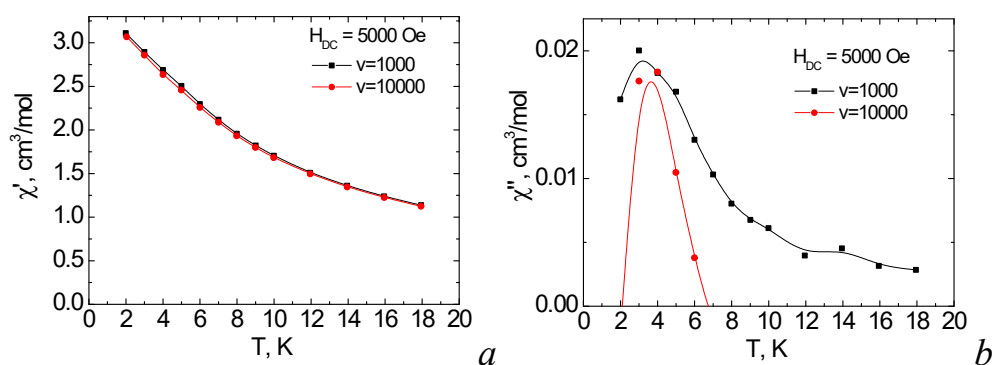

**Fig. S14.** Frequency dependencies of in-phase,  $\chi'$  (a) and out-of-phase,  $\chi''$  (b) components of dynamic magnetic susceptibility for complex  $2_{Ho}$  under magnetic field  $H = 5000$  Oe under various temperatures. Solid lines are visual guides.

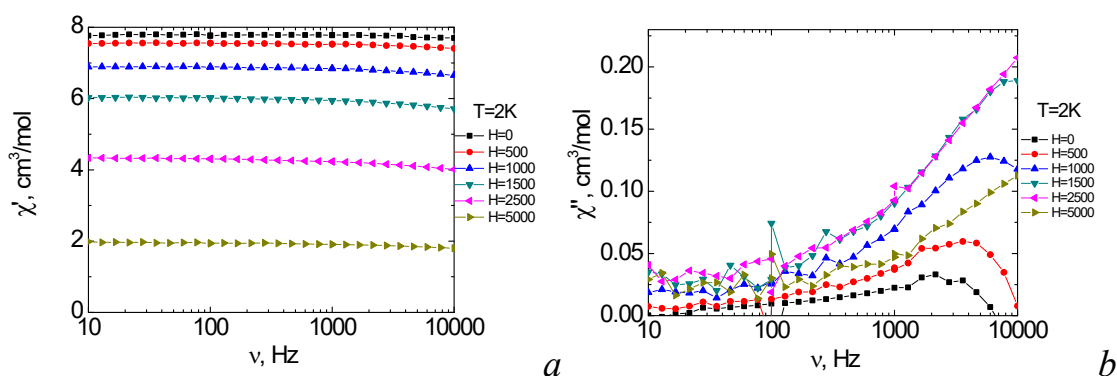

**Fig. S15.** Frequency dependencies of in-phase,  $\chi'$  (a) and out-of-phase,  $\chi''$  (b) components of dynamic magnetic susceptibility for complex  $2_{Er}$  at  $T = 2$  K under various dc magnetic fields.

Solid lines are visual guides.

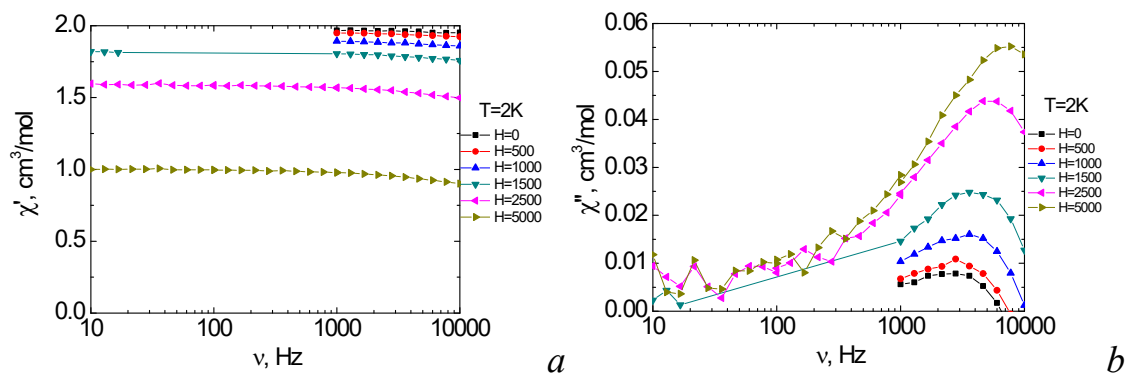

**Fig. S16.** Frequency dependencies of in-phase,  $\chi'$  (a) and out-of-phase,  $\chi''$  (b) components of dynamic magnetic susceptibility for complex  $2_{Vb}$  at  $T = 2$  K under various dc magnetic fields.

Solid lines are visual guides.

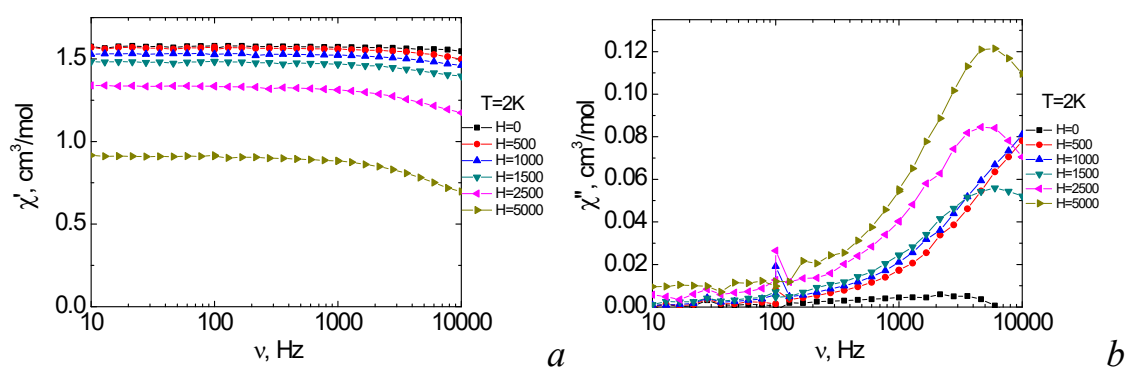

**Fig. S17.** Frequency dependencies of in-phase,  $\chi'$  (a) and out-of-phase,  $\chi''$  (b) components of dynamic magnetic susceptibility for complex  $2_V$  at  $T = 2$  K under various dc magnetic fields.

Solid lines are visual guides.



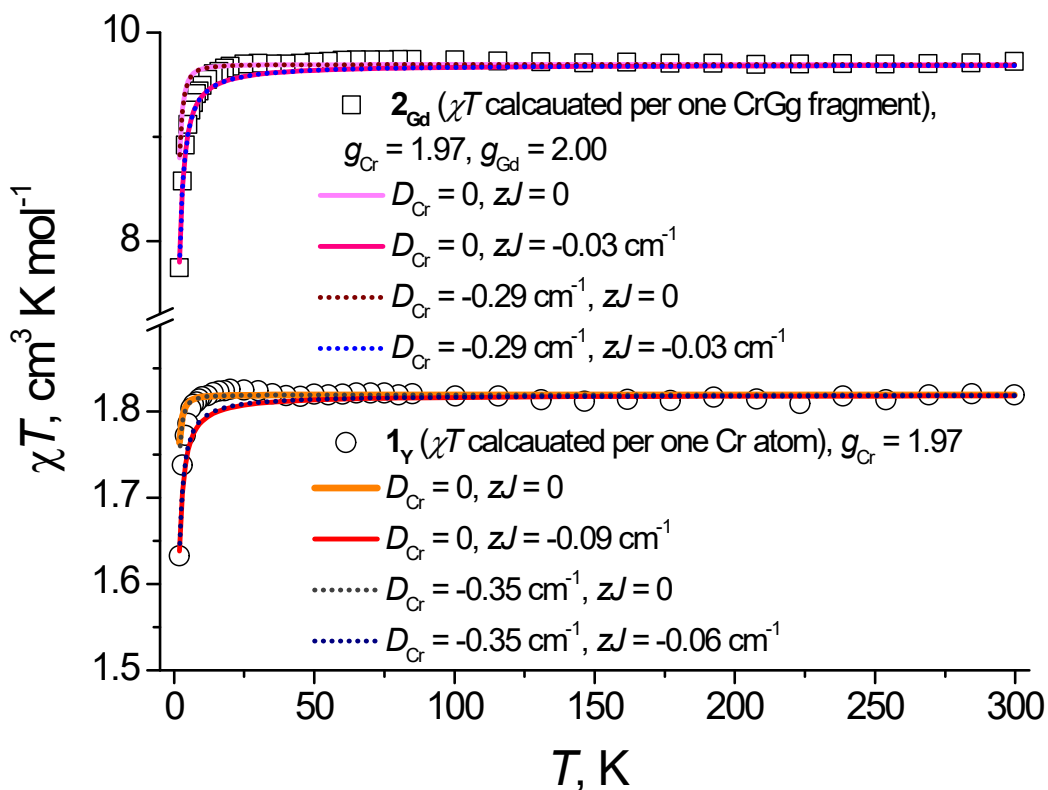

**Fig. S18.** Experimental  $\chi T$  vs.  $T$  plots and fits (see Table S9 for details) for compounds  $2_Y$  (at the bottom) and  $1_{Gd}$  (at the top) at 2-300 K,  $H_{dc} = 5000$  Oe.

**Table S9.** Best-fit approximation parameters of  $\chi T$  vs.  $T$  curves for  $2_Y$  and  $1_{Gd}$  ( $g$ -factors were fixed:  $g_{Cr} = 1.97$ ,  $g_{Gd} = 2.00$ ;  $R^2 = \sum[(\chi_M T)_{exp} - (\chi_M T)_{theor}]^2 / (\sum(\chi_M T)_{exp}^2)$ ).

| Fit number  | 1                         | 2                                                           | 3                               | 4                                                                                          |
|-------------|---------------------------|-------------------------------------------------------------|---------------------------------|--------------------------------------------------------------------------------------------|
| Fit details | $zJ = 0$                  | $zJ \neq 0$                                                 | $zJ = 0$                        | $zJ \neq 0$                                                                                |
| $2_Y$       | $D_{Cr} = 0$              |                                                             | $D_{Cr} = -1.1 \text{ cm}^{-1}$ | $D_{Cr} = -0.35 \text{ cm}^{-1}$                                                           |
|             | $R^2 = 1.7 \cdot 10^{-4}$ | $zJ = -0.09 \text{ cm}^{-1}$ ,<br>$R^2 = 8.9 \cdot 10^{-5}$ | $R^2 = 6.9 \cdot 10^{-5}$       | $R^2 = 1.3 \cdot 10^{-4}$ ,<br>$zJ = -0.06 \text{ cm}^{-1}$ ,<br>$R^2 = 4.4 \cdot 10^{-5}$ |
| $1_{Gd}$    | $D_{Cr} = 0$              |                                                             | $D_{Cr} = -7.0 \text{ cm}^{-1}$ | $D_{Cr} = -0.29 \text{ cm}^{-1}$                                                           |
|             | $R^2 = 6.4 \cdot 10^{-4}$ | $zJ = -0.03 \text{ cm}^{-1}$ ,<br>$R^2 = 6.5 \cdot 10^{-5}$ | $R^2 = 6.9 \cdot 10^{-5}$       | $R^2 = 6.3 \cdot 10^{-4}$ ,<br>$zJ = -0.03 \text{ cm}^{-1}$ ,<br>$R^2 = 6.6 \cdot 10^{-5}$ |

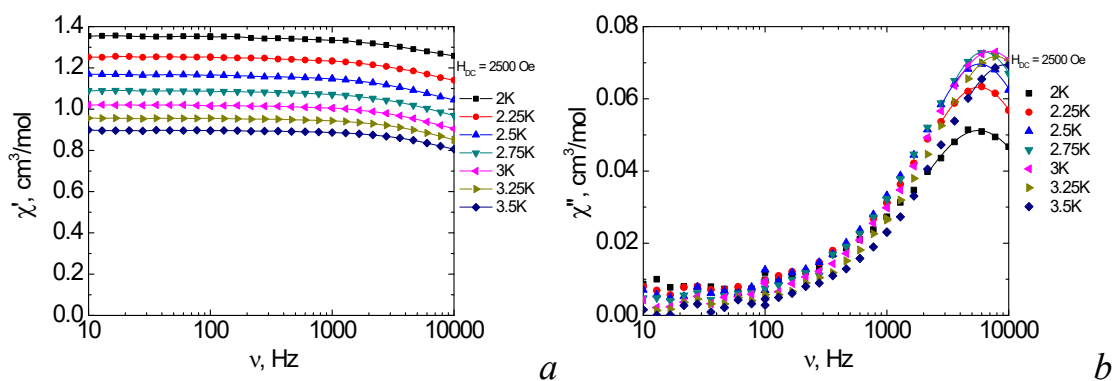

**Fig. S19.** Frequency dependences of the in-phase  $\chi'$  (a) and out-of-phase  $\chi''$  (b) components of the *ac* magnetic susceptibility between 2 and 3.5 K for  $1_{\text{Eu}}$  in 2500 Oe *dc*-field. Solid lines are visual guides (a), fits by the generalized Debye model (b).

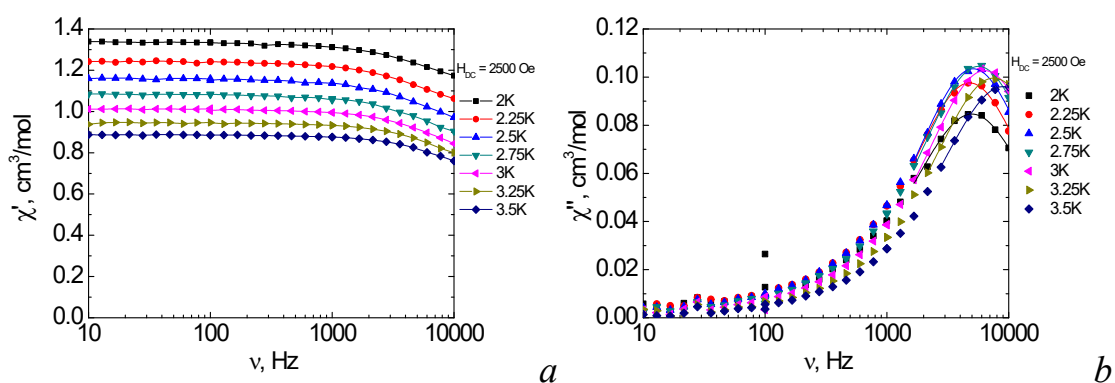

**Fig. S20.** Frequency dependences of the in-phase  $\chi'$  (a) and out-of-phase  $\chi''$  (b) components of the *ac* magnetic susceptibility between 2 and 3.5 K for  $2_{\text{Y}}$  in 2500 Oe *dc*-field. Solid lines are visual guides (a), fits by the generalized Debye model (b).

#### IV. Quantum-chemical calculations

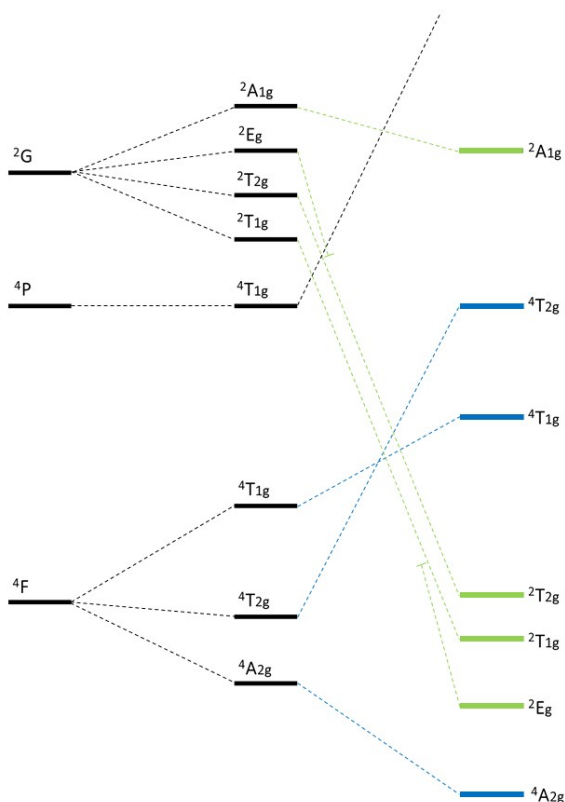

**Fig. S21.** The scheme of splitting of the three main orbital  ${}^4F$  and  ${}^2G$  levels as a result of distortion of the crystal field (relative arrangement of levels, the scale is not respected).

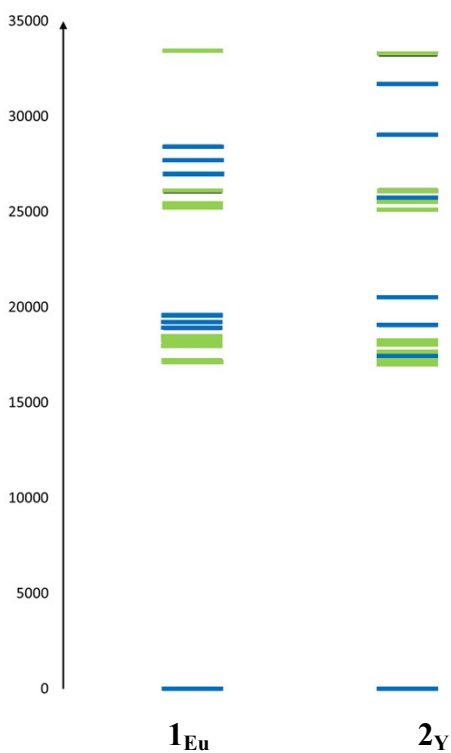

**Fig. S22.** Calculated energies of components of initial states for complexes  $1_{Eu}$  and  $2_Y$ . Blue and green levels are orbital quartets and doublets, respectively.

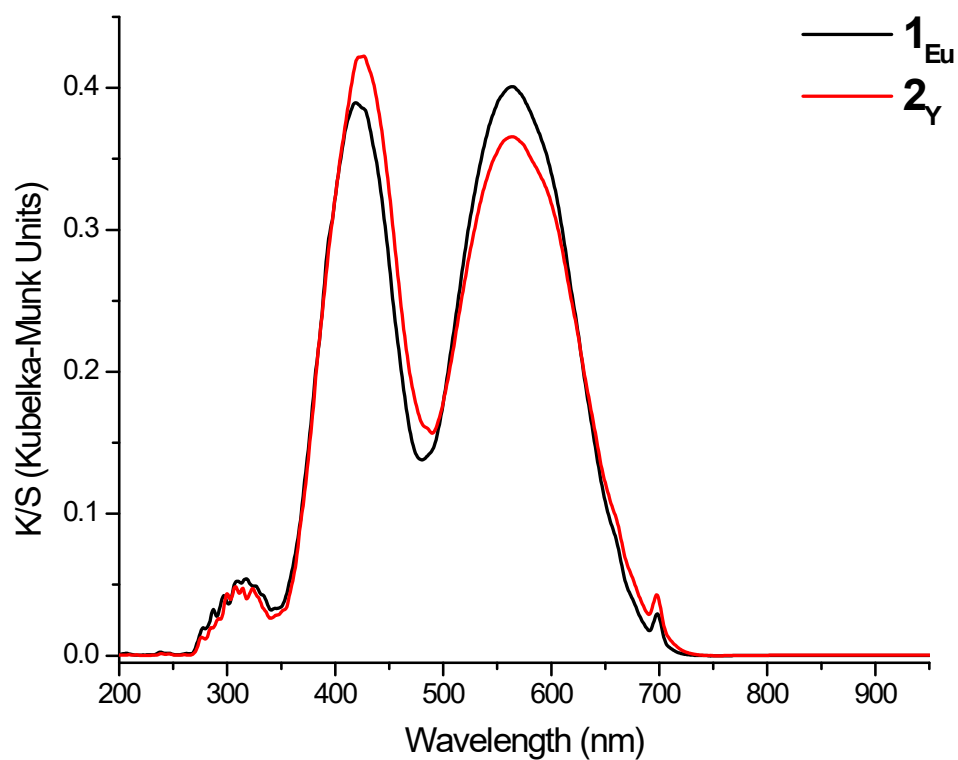

Fig. S23. Diffuse reflectance spectra of compounds  $1_{Eu}$  and  $1_Y$ .

Table S10. Calculated energies of the electronic states for  $Cr^{3+}$  ions in complexes  $1_{Eu}$  and  $2_Y$ .

| Term       | $1_{Eu}$                      |                | $2_Y$                         |                |
|------------|-------------------------------|----------------|-------------------------------|----------------|
|            | E, $cm^{-1}$                  | $\lambda$ , nm | E, $cm^{-1}$                  | $\lambda$ , nm |
| $^4A_{2g}$ | 0                             | 0              | 0                             | 0              |
| $^2E_g$    | 17189.0<br>17214.3            | 581            | 17032.8<br>17085.0            | 586            |
| $^2T_{1g}$ | 18024.2<br>18289.5<br>18363.1 | 549            | 17621.7<br>18080.3<br>18246.1 | 556            |
| $^4T_{1g}$ | 18904.3<br>19212.3<br>19594.4 | 520            | 17383.2<br>19055.7<br>20518.1 | 527            |
| $^2T_{2g}$ | 25229.1<br>25366.2<br>26076.6 | 391            | 25116.1<br>25608.7<br>26130.5 | 390            |
| $^4T_{2g}$ | 26991.2<br>27711.4<br>28425.5 | 361            | 25668.5<br>29051.5<br>31691.7 | 347            |
| $^2A_{1g}$ | 33446.3                       | 299            | 33253.1                       | 301            |

**Table S11.** The contribution of levels to the axial and rhombic components of magnetic anisotropy.

| Term      | $1_{Eu}$ |        | $2_Y$  |        |
|-----------|----------|--------|--------|--------|
|           | $D$      | $E$    | $D$    | $E$    |
| $4T_{1g}$ | -0.727   | 0.135  | -1.049 | 0.099  |
|           | 0.676    | 0.188  | 0.434  | -0.608 |
|           | -0.055   | -0.323 | 0.379  | 0.463  |
| $2T_{1g}$ | -0.706   | -0.711 | -0.637 | -0.621 |
|           | -0.689   | 0.687  | -0.624 | 0.631  |
|           | 1.136    | -0.002 | 1.176  | -0.025 |

**Table S12.** Calculated parameters of spin Hamiltonian (1).

| Parameter           | $1_{Eu}$ | $2_Y$  |
|---------------------|----------|--------|
| $D, \text{cm}^{-1}$ | -0.293   | -0.348 |
| $E/D$               | 0.098    | 0.124  |
| $g_z$               | 1.970    | 1.967  |
| $g_x$               | 1.972    | 1.972  |
| $g_y$               | 1.971    | 1.974  |
| $g_{iso}$           | 1.971    | 1.971  |

**Table S13.** Energies of six lower Kramers doublets.

| $1_{Eu}$ | $2_Y$   |
|----------|---------|
| 0        | 0       |
| 0.6      | 0.7     |
| 17134.4  | 16894.4 |
| 17170.8  | 17042.1 |
| 17992.1  | 17360.7 |
| 18254.2  | 17478.8 |

## V. Thermal analysis

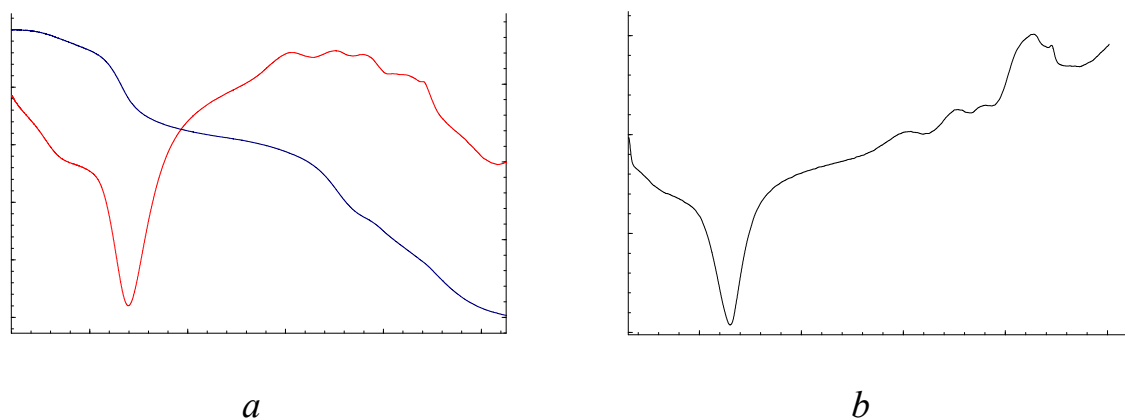

**Fig. S24.** TGA (blue), DTA (red) (*a*) and DSC (*b*) curves for the thermal decomposition of **1Eu**.

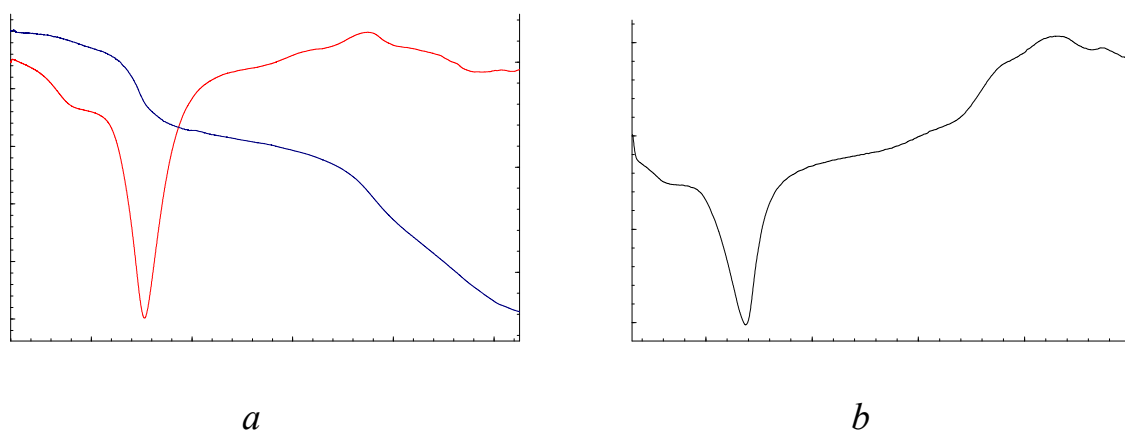

**Fig. S25.** TGA (blue), DTA (red) (*a*) and DSC (*b*) curves for the thermal decomposition of **1Ga**.

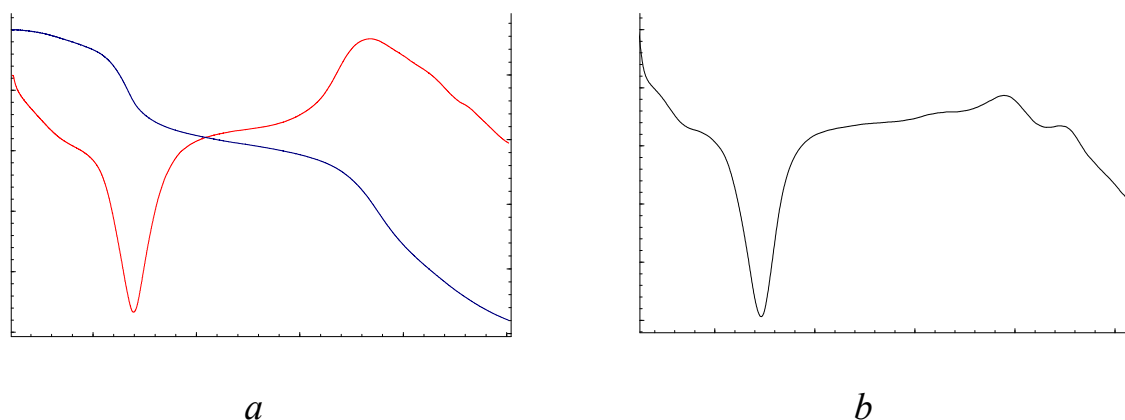

**Fig. S26.** TGA (blue), DTA (red) (*a*) and DSC (*b*) curves for the thermal decomposition of **1Tb**.

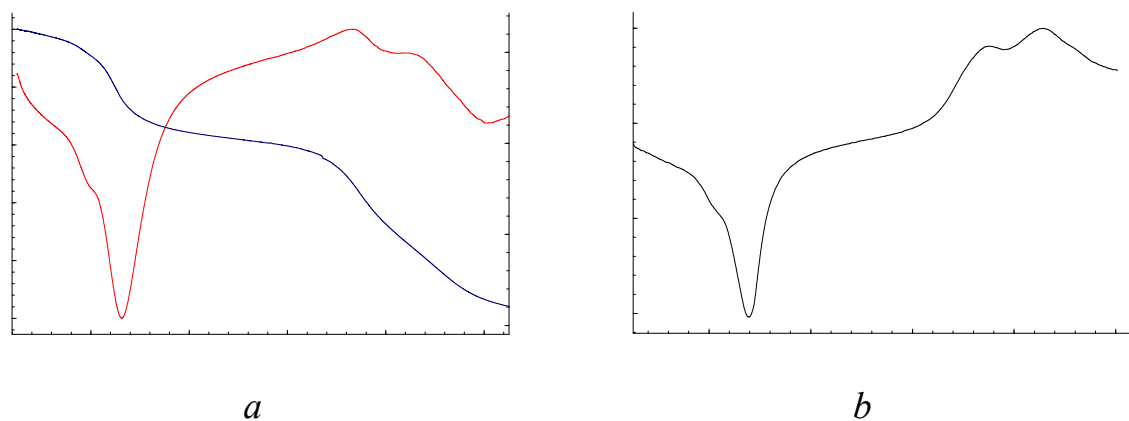

**Fig. S27.** TGA (blue), DTA (red) (*a*) and DSC (*b*) curves for the thermal decomposition of **2<sub>Ho</sub>**.

**Table S14.** Characteristics of the solid-phase thermolysis of **1<sub>Eu</sub>**, **1<sub>Gd</sub>**, **1<sub>Tb</sub>**, **2<sub>Ho</sub>**.

| Complex               | $t_{onset}$ (I),<br>°C | $t_{onset}$ (II),<br>°C | $t_{onset}$ (III),<br>°C | $\Delta m$ (I),<br>% | $\Delta m_{expected}$<br>(I), % | $\Delta m$ (II),<br>% | $\Delta m$ (III),<br>% |
|-----------------------|------------------------|-------------------------|--------------------------|----------------------|---------------------------------|-----------------------|------------------------|
| <b>1<sub>Eu</sub></b> | 28                     | 246                     | 534.7                    | 18.9                 | 19.8                            | 30.9                  | 4.8                    |
| <b>1<sub>Gd</sub></b> | 41                     | 283                     | 539.2                    | 19.4                 | 19.7                            | 30.8                  | 6.1                    |
| <b>1<sub>Tb</sub></b> | 25                     | 251                     | 529                      | 19.1                 | 19.6                            | 29.1                  | 4.9                    |
| <b>2<sub>Ho</sub></b> | 26                     | 243.9                   | 541.3                    | 18.9                 | 19.5                            | 29.5                  | 6.2                    |

## VI. X-Ray Crystallography

**Table S15.** Crystallographic parameters and structure refinement statistics for compounds **1<sub>Eu</sub>**, **1<sub>Gd</sub>**, **1<sub>Tb</sub>**, **2<sub>Ho</sub>**, and **3**.

| Parameter                                                                                                        | <b>1<sub>Eu</sub></b>                                                                | <b>1<sub>Gd</sub></b>                                                                | <b>1<sub>Tb</sub></b>                                                                | <b>2<sub>Ho</sub></b>                                                              | <b>3</b>                                          |
|------------------------------------------------------------------------------------------------------------------|--------------------------------------------------------------------------------------|--------------------------------------------------------------------------------------|--------------------------------------------------------------------------------------|------------------------------------------------------------------------------------|---------------------------------------------------|
| Empirical formula                                                                                                | C <sub>30</sub> H <sub>59</sub> Cr <sub>2</sub> Eu <sub>2</sub><br>O <sub>41.5</sub> | C <sub>30</sub> H <sub>59</sub> Cr <sub>2</sub> Gd <sub>2</sub><br>O <sub>41.5</sub> | C <sub>30</sub> H <sub>59</sub> Cr <sub>2</sub> Tb <sub>2</sub><br>O <sub>41.5</sub> | C <sub>30</sub> H <sub>48</sub> Cr <sub>2</sub> Ho <sub>2</sub><br>O <sub>37</sub> | C <sub>10</sub> H <sub>17</sub> CrO <sub>12</sub> |
| Formula weight (g·mol <sup>-1</sup> )                                                                            | 1491.69                                                                              | 1505.61                                                                              | 1502.27                                                                              | 1434.54                                                                            | 381.23                                            |
| <i>T</i> (K)                                                                                                     | 150                                                                                  | 150                                                                                  | 150                                                                                  | 150                                                                                | 296                                               |
| Crystal system                                                                                                   | Tetragonal                                                                           | Tetragonal                                                                           | Tetragonal                                                                           | Tetragonal                                                                         | Monoclinic                                        |
| Space group                                                                                                      | <i>P</i> 4 <sub>3</sub> 2 <sub>1</sub> 2                                             | <i>P</i> 4 <sub>3</sub> 2 <sub>1</sub> 2                                             | <i>P</i> 4 <sub>1</sub> 2 <sub>1</sub> 2                                             | <i>I</i> 4                                                                         | <i>P</i> 2 <sub>1</sub> / <i>c</i>                |
| <i>a</i> (Å)                                                                                                     | 16.2441(3)                                                                           | 16.2257(6)                                                                           | 16.2441(3)                                                                           | 16.2371(6)                                                                         | 8.3636(4)                                         |
| <i>b</i> (Å)                                                                                                     | 16.2441(3)                                                                           | 16.2257(6)                                                                           | 16.2441(3)                                                                           | 16.2371(6)                                                                         | 12.1817(6)                                        |
| <i>c</i> (Å)                                                                                                     | 38.4605(17)                                                                          | 38.4293(18)                                                                          | 38.4605(17)                                                                          | 20.3655(11)                                                                        | 14.0600(6)                                        |
| β (deg)                                                                                                          | 90                                                                                   | 90                                                                                   | 90                                                                                   | 90                                                                                 | 97.025(2)                                         |
| <i>V</i> (Å <sup>3</sup> )                                                                                       | 10148.6(6)                                                                           | 10117.4(9)                                                                           | 10148.6(6)                                                                           | 5369.2(5)                                                                          | 1421.72(12)                                       |
| <i>Z</i>                                                                                                         | 8                                                                                    | 8                                                                                    | 8                                                                                    | 4                                                                                  | 4                                                 |
| <i>D</i> <sub>calc</sub> (g·cm <sup>-3</sup> )                                                                   | 1.953                                                                                | 1.973                                                                                | 1.971                                                                                | 1.775                                                                              | 1.781                                             |
| θ <sub>min</sub> –θ <sub>max</sub> (deg)                                                                         | 2.38–30.50                                                                           | 2.38–26.39                                                                           | 2.39–30.11                                                                           | 2.51–30.41                                                                         | 2.45–30.48                                        |
| μ (mm <sup>-1</sup> )                                                                                            | 2.97                                                                                 | 3.12                                                                                 | 3.29                                                                                 | 3.41                                                                               | 0.87                                              |
| Crystal size (mm)                                                                                                | 0.12×0.11×0.10                                                                       | 0.1×0.05×0.05                                                                        | 0.11×0.11×0.1                                                                        | 0.09×0.08×0.01                                                                     | 0.13×0.11×0.10                                    |
| Number of measured reflections                                                                                   | 105349                                                                               | 50195                                                                                | 84053                                                                                | 20459                                                                              | 7680                                              |
| Number of independent reflections                                                                                | 13498                                                                                | 9940                                                                                 | 9976                                                                                 | 5215                                                                               | 2749                                              |
| Number of reflections with <i>I</i> > 2σ( <i>I</i> )                                                             | 12821                                                                                | 9054                                                                                 | 9384                                                                                 | 4997                                                                               | 2464                                              |
| <i>R</i> <sub>int</sub>                                                                                          | 0.048                                                                                | 0.069                                                                                | 0.059                                                                                | 0.113                                                                              | 0.022                                             |
| GOOF                                                                                                             | 1.042                                                                                | 1.037                                                                                | 1.034                                                                                | 1.095                                                                              | 1.208                                             |
| <i>R</i> <sub><i>I</i></sub> <sup>[a]</sup> , <i>wR</i> <sub>2</sub> <sup>[b]</sup> ( <i>I</i> > 2σ( <i>I</i> )) | 0.024, 0.056                                                                         | 0.032, 0.064                                                                         | 0.025, 0.055                                                                         | 0.0594, 0.1592                                                                     | 0.035, 0.096                                      |
| <i>R</i> <sub><i>I</i></sub> <sup>[a]</sup> , <i>wR</i> <sub>2</sub> <sup>[b]</sup> (all data)                   | 0.027, 0.057                                                                         | 0.039, 0.067                                                                         | 0.029, 0.057                                                                         | 0.0622, 0.1629                                                                     | 0.040, 0.099                                      |
| <i>T</i> <sub>min</sub> , <i>T</i> <sub>max</sub>                                                                | 0.298, 0.381                                                                         | 0.586, 0.745                                                                         | 0.654, 0.746                                                                         | 0.257, 0.381                                                                       | 0.323, 0.381                                      |
| Δρ <sub>max</sub> , Δρ <sub>min</sub> (e Å <sup>-3</sup> )                                                       | 1.9, -0.69                                                                           | 0.69, -0.70                                                                          | 0.70, -0.64                                                                          | 1.72, -1.08                                                                        | 0.50, -0.56                                       |

<sup>[a]</sup>  $R_I = \sum ||F_o| - |F_c|| / \sum |F_o|$ . <sup>[b]</sup>  $wR_2 = [\sum w(F_o^2 - F_c^2)^2 / \sum w(F_o^2)^2]^{1/2}$
